# Supplementary material
Source: bioRxiv or medRxiv preprint supplement (https://medrxiv.org/highwire/filestream/94503/field_highwire_adjunct_files/0/2020.07.22.20159913-1.pdf)

## Supplementary Information

Supplement Figure 1. Percentage of deaths cremated by Age for Ontario in 2017-2019. The values were calculated using Statistics Canada's 2017-2018 age stratified mortality.

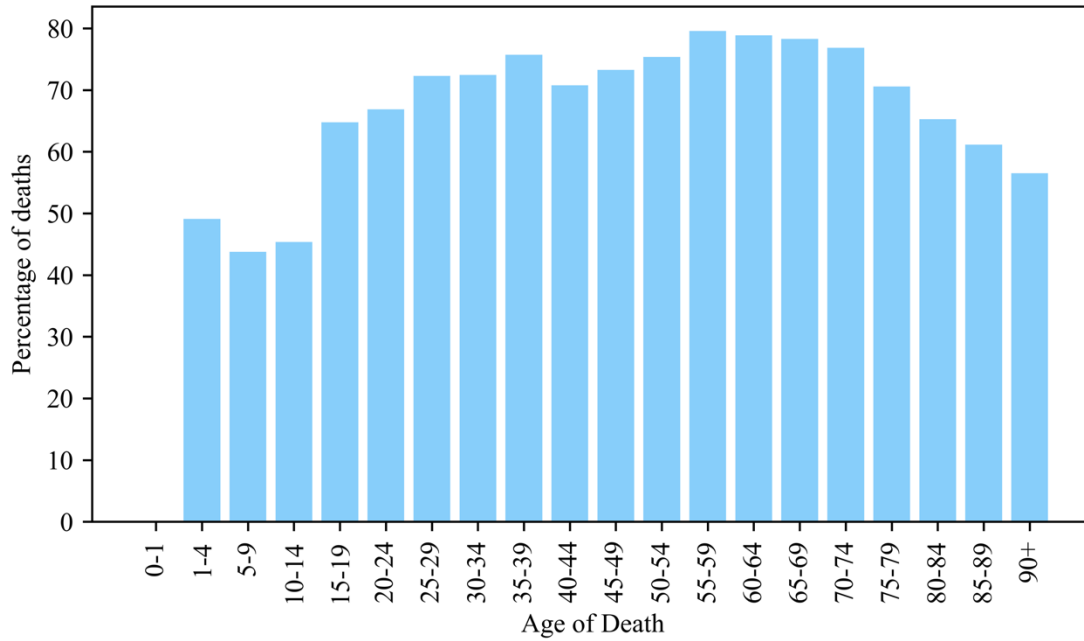

Supplement Table 1. Total long-term care deaths by time period.

|                           | TOTAL LTC CREMATIONS | TOTAL LTC DEATHS | LTC CREMATION RATE |
|---------------------------|----------------------|------------------|--------------------|
| 2017                      | 12386                | 18669            | 66.72%             |
| 2018                      | 12838                | 18204            | 71.51%             |
| 2019 (1 Jan to 1 Oct)     | 9439                 | 13365            | 70.62%             |
| 2020 (15 April to 31 May) | 2444                 | 3766             | 64.90%             |

Supplement Figure 2. Number of cremations in 2020 by month in the bar and the projected numbers of cremations with 95% confidence intervals derived from the time series model.

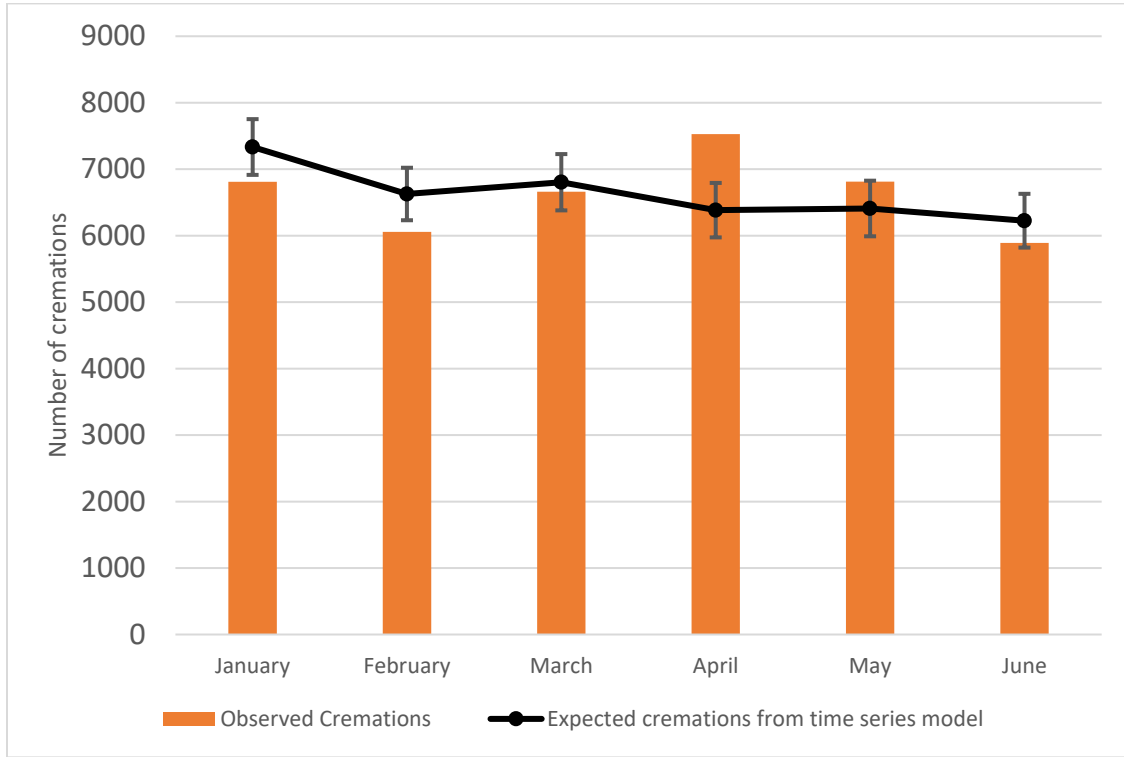

Supplement Figure 3: Monthly cremation by facility compared to averages for 2017-2019.

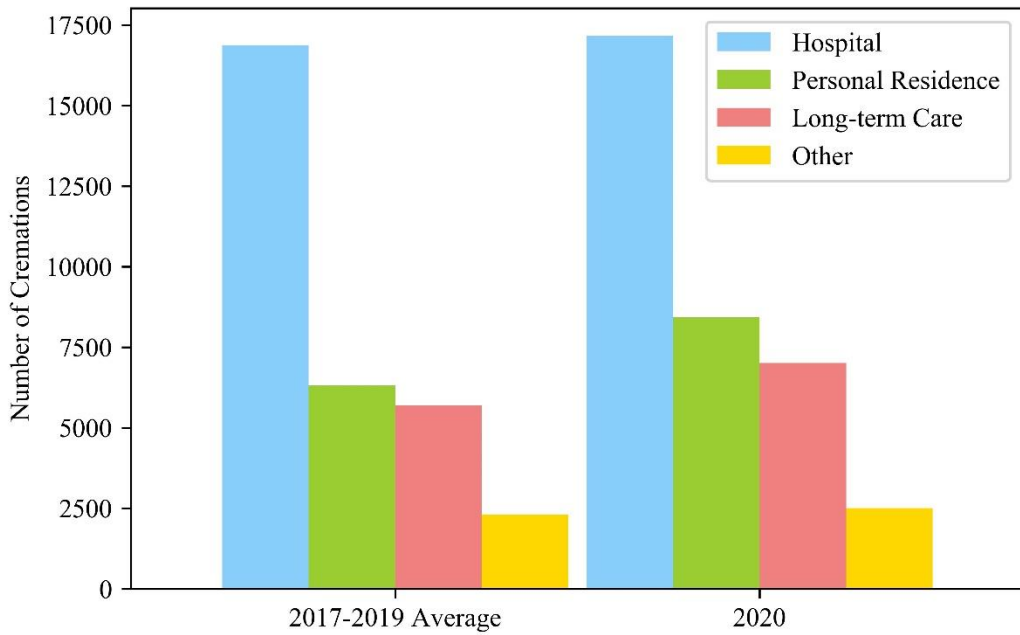

Supplement: Supplementary file [file 2020.07.22.20159913-1.pdf]
